# Supplementary material for: Ozone generation mechanism over phosphorus and the impact of H2O with density functional modeling
Source: Royal Society of Chemistry journal article supplement (doi:10.1039/c9nj02937k), 2019-01-01
Supplement: c9nj02937k1.pdf [file c9nj02937k1.pdf]

### Supplementary materials

Figure

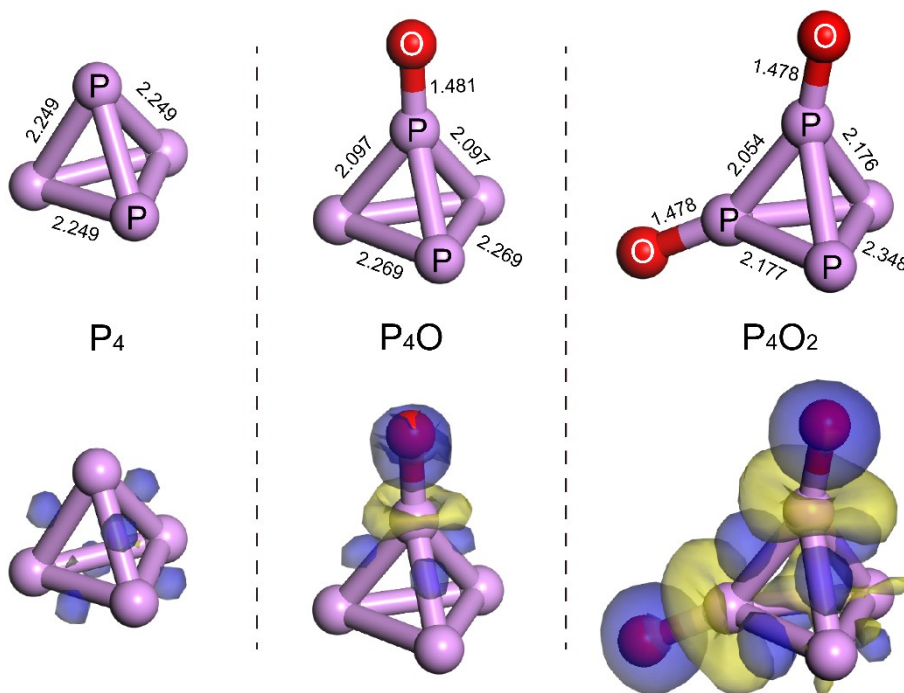

Fig. S1 Bond length and charge density of  $P_4$ ,  $P_4O$  and  $P_4O_2$  (Bond length in Å)

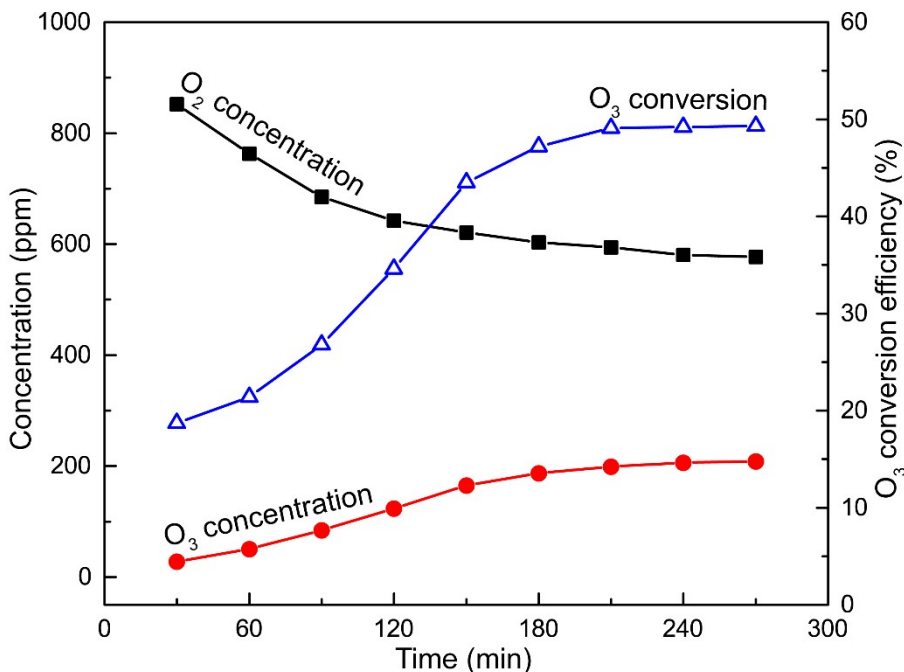

Fig. S2 Static experiment for  $O_3$  generation over  $P_4$  (Reaction conditions: reaction temperature = 25 °C; gas hourly space velocity = 1000  $h^{-1}$ ; balanced gas =  $N_2$ , initial  $O_2$  = 1000 ppm)

## Tables

**Table S1** Imaginary frequencies of the transition states and bonds corresponding to relative normal vibrations for ozone generation without the involvement of H<sub>2</sub>O

| Transition States | Imaginary frequency<br>(cm <sup>-1</sup> ) | Bonds corresponding to<br>relative normal vibrations |
|-------------------|--------------------------------------------|------------------------------------------------------|
| TS1               | -1429.07                                   | O5-O6                                                |
| TS2               | -1022.86                                   | O6-O7                                                |
| TS3               | -1307.51                                   | O5-P1                                                |
| TS4               | -1148.19                                   | O11-O12                                              |
| TS5               | -989.43                                    | O12-O13                                              |

**Table S2** Imaginary frequency of the transition states and bonds corresponding to relative normal vibrations for ozone generation with the involvement of H<sub>2</sub>O

| Transition States | Imaginary frequency<br>(cm <sup>-1</sup> ) | Bonds corresponding to<br>relative normal vibrations |
|-------------------|--------------------------------------------|------------------------------------------------------|
| TS6               | -857.35                                    | H8-O7                                                |
| TS7               | -1207.69                                   | H8-O6                                                |
| TS8               | -785.32                                    | O6-O10                                               |
